# Supplementary material
Source: Springer Nature journal article supplement (https://www.springermedizin.de/resource/supplementary/12936_2014_3176_MOESM9_ESM.pdf/9545226)
Supplement: MOESM9 [file 9545226]

$\chi^2=28994.5$ ,  
d.f. =5,  $P<0.001$

Health Facilities  
Community Health Worker  
( $\chi^2=723.4$ , d.f. =5,  $P<0.001$ )

Passive testing of self-reporting patients  
( $\chi^2=3867.3$ , d.f.=5,  $P<0.001$ )  
Active testing of residents during  
monthly household visits

PROPORTION

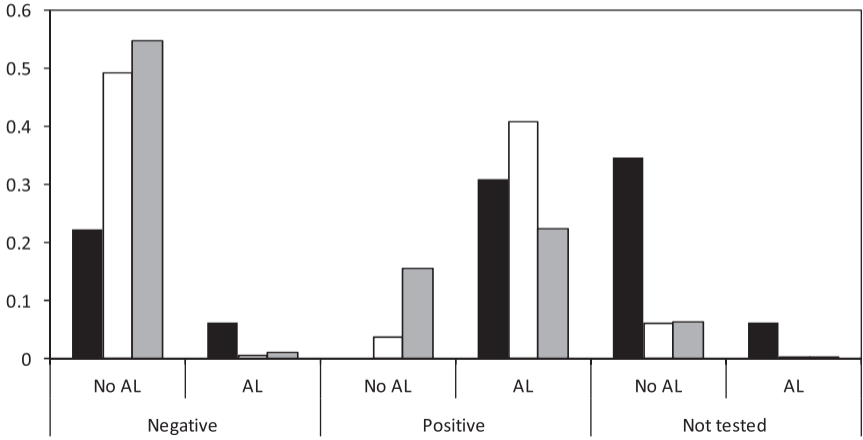

RDT TEST RESULTS AND TREATMENT PRACTICE
